# Supplementary material for: Characterization of nuclear pore complex components in fission yeast Schizosaccharomyces pombe
Source: PubMed Central journal article supplement — Nucleus. 2014 Mar 12;5(2):149–62. doi: 10.4161/nucl.28487 (PMC4049921; doi:10.4161/nucl.28487), 2014-03-12

**Supplemental Material to:**

**Haruhiko Asakawa, Hui-Ju Yang, Takaharu G  
Yamamoto, Chizuru Ohtsuki, Yuji Chikashige,  
Kumiko Sakata-Sogawa, Makio Tokunaga,  
Masaaki Iwamoto, Yasushi Hiraoka, and  
Tokuko Haraguchi**

**Characterization of nuclear pore complex components in  
fission yeast *Schizosaccharomyces pombe***

**Nucleus 2013; 5(2)**

**<http://dx.doi.org/10.4161/nucl.28487>**

**<http://www.landesbioscience.com/journals/nucleus/article/28487/>**

## Supplemental Data

### Characterization of nuclear pore complex components in fission yeast

#### *Schizosaccharomyces pombe*

Haruhiko Asakawa,<sup>1</sup> Hui-Ju Yang,<sup>1</sup> Takaharu G Yamamoto,<sup>2</sup> Chizuru Ohtsuki,<sup>1</sup> Yuji Chikashige,<sup>2,3</sup>  
Kumiko Sakata-Sogawa,<sup>4,5</sup> Makio Tokunaga,<sup>4,5</sup> Masaaki Iwamoto,<sup>2</sup> Yasushi Hiraoka,<sup>1,2,3</sup> and Tokuko  
Haraguchi<sup>1,2,3,\*</sup>

**Table S1.** Nucleoporin genes in *S. pombe*

| <i>S. pombe</i><br>nucleoporin<br>names | ORF names     | experimental evidence for<br>nucleoporin (references) |                                           | GFP fusion<br>constructs | nuclear<br>periphery<br>localization | Orthologs         |                                     |                        |                       |
|-----------------------------------------|---------------|-------------------------------------------------------|-------------------------------------------|--------------------------|--------------------------------------|-------------------|-------------------------------------|------------------------|-----------------------|
|                                         |               |                                                       |                                           |                          |                                      | <i>H. sapiens</i> | <i>S. cerevisiae</i>                | <i>A. nidulans</i>     | <i>A. thaliana</i>    |
| spCut11                                 | SPAC1786.03   | yes                                                   | (West et al.) <sup>26</sup>               | Cut11-GFP-HA             | yes                                  | hsNdc1            | scNdc1                              | An-Ndc1                | -                     |
| spNup85                                 | SPBC17G9.04c  | yes                                                   | (Baï et al; Chen et al.) <sup>19,29</sup> | Nup85-GFP-HA             | yes                                  | hsNup75/85        | scNup85                             | An-Nup85               | atNup75               |
| spNup107                                | SPBC428.01c   | yes                                                   | (Baï et al; Chen et al.) <sup>19,29</sup> | Nup107-GFP-HA            | yes                                  | hsNup107          | scNup84                             | An-Nup84               | atNup107              |
| spNup120                                | SPBC3B9.16c   | yes                                                   | (Baï et al.) <sup>19</sup>                | Nup120-GFP-HA            | yes                                  | hsNup160          | scNup120                            | An-Nup120              | atNup160              |
| spNup131                                | SPBP35G2.06c  | yes                                                   | (Baï et al.) <sup>19</sup>                | GFP-Nup131               | yes                                  | hsNup133          | scNup133                            | An-Nup133              | atNup133              |
| spNup132                                | SPAC1805.04   | yes                                                   | (Baï et al; Chen et al.) <sup>19,29</sup> | GFP-Nup132               | yes                                  |                   |                                     |                        |                       |
| spNup189c                               | SPAC1486.05   | yes                                                   | (Chen et al.) <sup>29</sup>               | Nup189c-GFP-HA           | yes                                  | hsNup96           | scNup145c                           | SonBc <sup>Nup96</sup> | atNup96/PRECOZ        |
| spSeh1                                  | SPAC15F9.02   | yes                                                   | (Baï et al; Chen et al.) <sup>19,29</sup> | Seh1-GFP-HA              | yes                                  | hsSeh1<br>/Sec13L | scSeh1                              | An-Seh1                | atSeh1                |
| spNup97/Mug87                           | SPCC1620.11   | yes                                                   | (Cho et al.) <sup>30</sup>                | GFP-Nup97                | yes                                  | hsNup93           | scNic96                             | An-Nic96               | atNup93a              |
| spNpp106                                | SPCC1739.14   | yes                                                   | (Yoon et al.) <sup>25</sup>               | Npp106-GFP               | yes                                  |                   |                                     |                        | atNup93b              |
| spNup186                                | SPCC290.03c   | yes                                                   | (Chen et al.) <sup>29</sup>               | Nup186-GFP               | yes                                  | hsNup205          | scNup192                            | An-Nup192              | atNup205              |
| spNup40                                 | SPAC890.06    | yes                                                   | (Chen et al.) <sup>29</sup>               | GFP-Nup40                | yes                                  | hsNup35<br>/MP-44 | scNup53,<br>scNup59                 | -                      | atNup35               |
| spNsp1                                  | SPAC26A3.15c  | yes                                                   | (Chen et al.) <sup>29</sup>               | GFP-Nsp1                 | yes                                  | hsNup62           | scNsp1                              | An-Nsp1                | atNup62               |
| spNup44                                 | SPBC19G7.15   | yes                                                   | (Chen et al.) <sup>29</sup>               | Nup44-GFP-HA             | yes                                  | hsNup54           | scNup57                             | An-Nup57               | atNup54               |
| spNup45                                 | SPAC22G7.09c  | yes                                                   | (Chen et al.) <sup>29</sup>               | Nup45-GFP-HA             | yes                                  | hsNup58           | scNup49                             | An-Nup49               | atNup58               |
| spNup146                                | SPAC23D3.06c  | yes                                                   | (Chen et al.) <sup>29</sup>               | Nup146-GFP-HA            | yes                                  | hsNup214          | scNup159                            | An-Nup159              | atNup214              |
| spNup61                                 | SPCC18B5.07c  | yes                                                   | (Chen et al.) <sup>29</sup>               | Nup61-GFP-HA             | yes                                  | hsNup50           | scNup2                              | An-Nup2                | atNup50a,<br>atNup50b |
| spNup124                                | SPAC30D11.04c | yes                                                   | (Balasundaram et al.) <sup>27</sup>       | GFP-Nup124               | yes                                  | hsNup153          | scNup1                              | -                      | atNup136 /Nup1        |
| spNup211                                | SPCC162.08c   | yes                                                   | (Chen et al.) <sup>29</sup>               | Nup211-GFP               | yes                                  | hsTpr             | scMlp1,<br>scMlp2                   | An-Mlp1                | atTpr/NUA             |
| spNup189n                               | SPAC1486.05   | yes                                                   | (Tange et al.) <sup>35</sup>              | Nup189n-GFP              | yes                                  | hsNup98           | scNup100,<br>scNup116,<br>scNup145n | SonBn <sup>Nup98</sup> | atNup98a,<br>atNup98b |
| spRae1                                  | SPBC16A3.05c  | yes                                                   | (Brown et al.) <sup>24</sup>              | GFP-Rae1                 | yes                                  | hsRAE1            | scGle2                              | SonA <sup>Gle2</sup>   | atRAE1                |
| spEly5                                  | SPBC29A10.06c | yes                                                   | (Asakawa et al; Bilokapic and             | Ely5-GFP-HA              | yes                                  | hsELYS            | -                                   | An-ELYS                | atElys /HOS1          |

|               |               |     |                                                                |               |     |                       |                       |           |           |
|---------------|---------------|-----|----------------------------------------------------------------|---------------|-----|-----------------------|-----------------------|-----------|-----------|
|               |               |     | Schwartz) <sup>32,33</sup>                                     |               |     |                       |                       |           |           |
| spNup37       | SPAC4F10.18   | yes | (Asakawa et al;<br>Bilokapic and<br>Schwartz) <sup>32,33</sup> | Nup37-GFP     | yes | hsNup37               | -                     | An-Nup37  | -         |
| spPom34/Mug31 | SPAC1002.02   | no  |                                                                | Pom34-GFP     | yes | -                     | scPom34               | An-Pom34  | -         |
| spPom152      | SPBC29A10.07  | no  |                                                                | Pom152-GFP-HA | yes | -                     | scPom152              | An-Pom152 | -         |
| spNup184      | SPAP27G11.10c | no  |                                                                | Nup184-GFP    | yes | hsNup188              | scNup188              | An-Nup188 | At4g38760 |
| spNup155      | SPAC19E9.01c  | no  |                                                                | Nup155-GFP    | yes | hsNup155              | scNup157,<br>scNup170 | An-Nup170 | atNup155  |
| spNup82       | SPBC13A2.02   | no  |                                                                | Nup82-GFP-HA  | yes | hsNup88               | scNup82               | An-Nup82  | atNup88   |
| spNup60       | SPCC285.13c   | no  |                                                                | Nup60-GFP     | yes | -                     | scNup60               | -         | -         |
| spAmo1        | SPBC15D4.10c  | no  |                                                                | Amo1-GFP      | yes | hsNlp1<br>/hCG1/NUPL2 | scNup42/Rip1          | An-Nup42  | -         |
| spTts1        | SPBC1539.04   | no  |                                                                | Tts1-GFP-HA   | yes | hsTMEM33              | scPom33,<br>scPer33   | AN6689.2  | At3g02420 |

## Supplemental figure legends

**Figure S1.** The domain organization of *S. pombe* nucleoporins. The predicted domain features are shown in this schematic. The scale at the top indicates the number of amino acids. The orange vertical lines in spNup1, spNup44, spNup45, spNup146, spNup189n, spNup61 and spNup124 indicate the position of FG repeats. TM, transmembrane domain; WD, WD40 repeats. Positions and descriptions for domains are according to the *S. pombe* genome database (<http://www.pombase.org/>).

**Figure S2.** Western blot analysis of GFP-tagged Nup107-Nup160 subcomplex nucleoporins. Whole cell extracts equivalent to  $1 \times 10^6$  cells were subjected to SDS-PAGE and transferred to PVDF membranes. GFP-fused nucleoporins, indicated at the top, were detected using anti-GFP antibody. Asterisks indicate non-specific bands. The arrow indicates the position of GFP. WT cells not expressing GFP and cells expressing GFP were used as negative and positive controls for detection of GFP, respectively: In the positive control cells, GFP was expressed under the *nda3* gene promoter in the wild type background. Data sets for **(A)** and **(B)** were taken separately so as to get a similar staining intensity of the GFP band compared with the GFP-nucleoporin bands; this was necessitated by the fact that the amount of GFP expressed in the positive control cells was much higher than the amount of GFP-nucleoporin expressed in the GFP-nucleoporin strains.

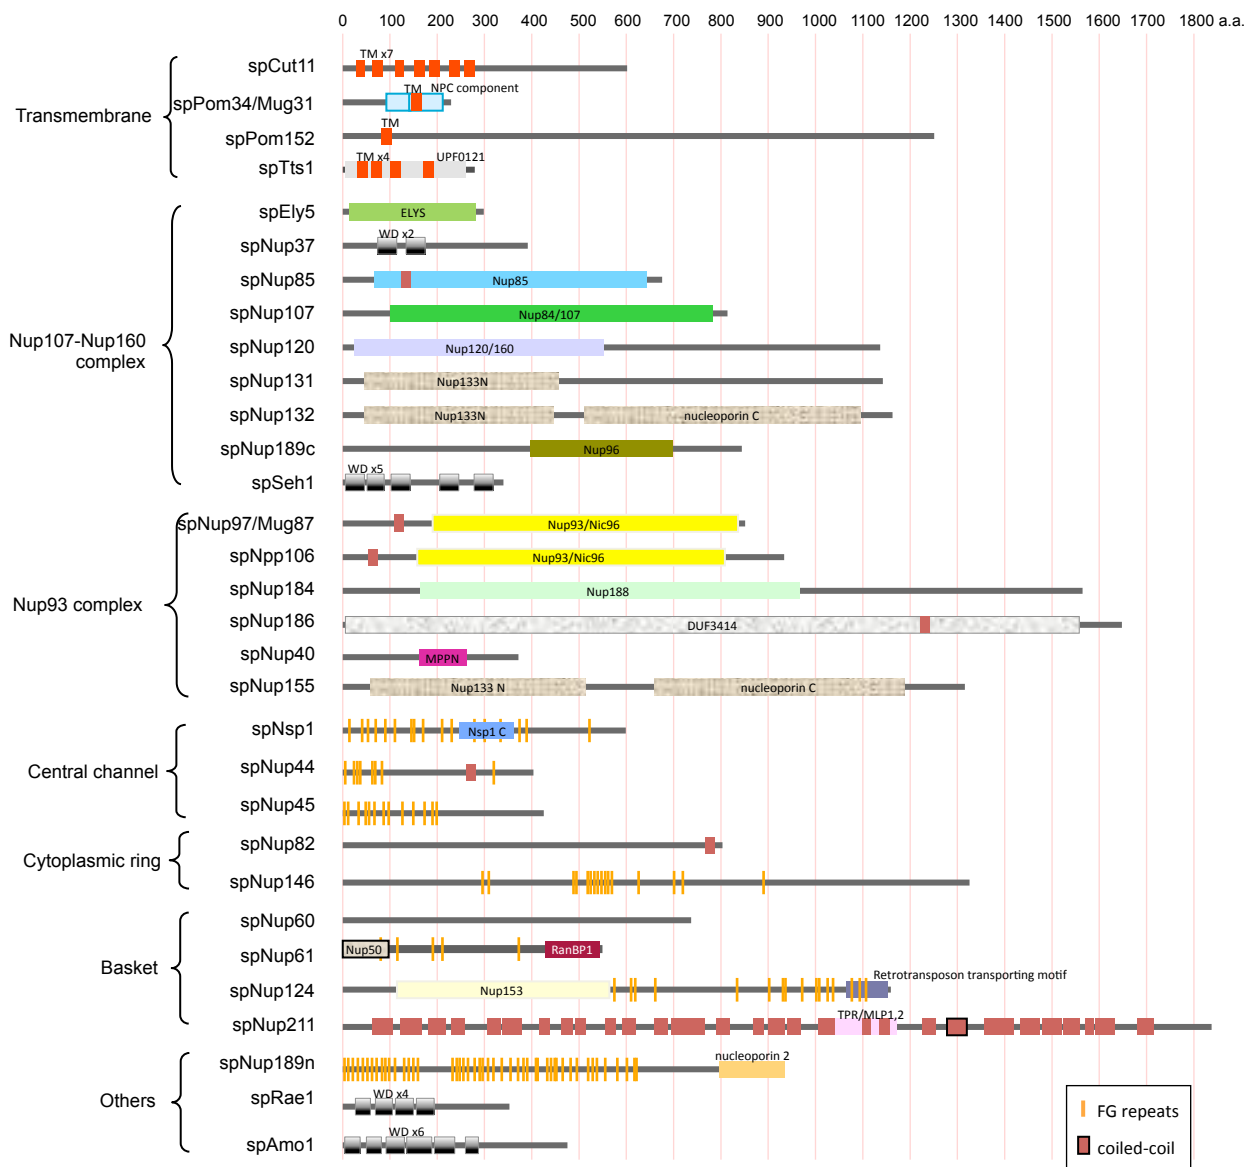

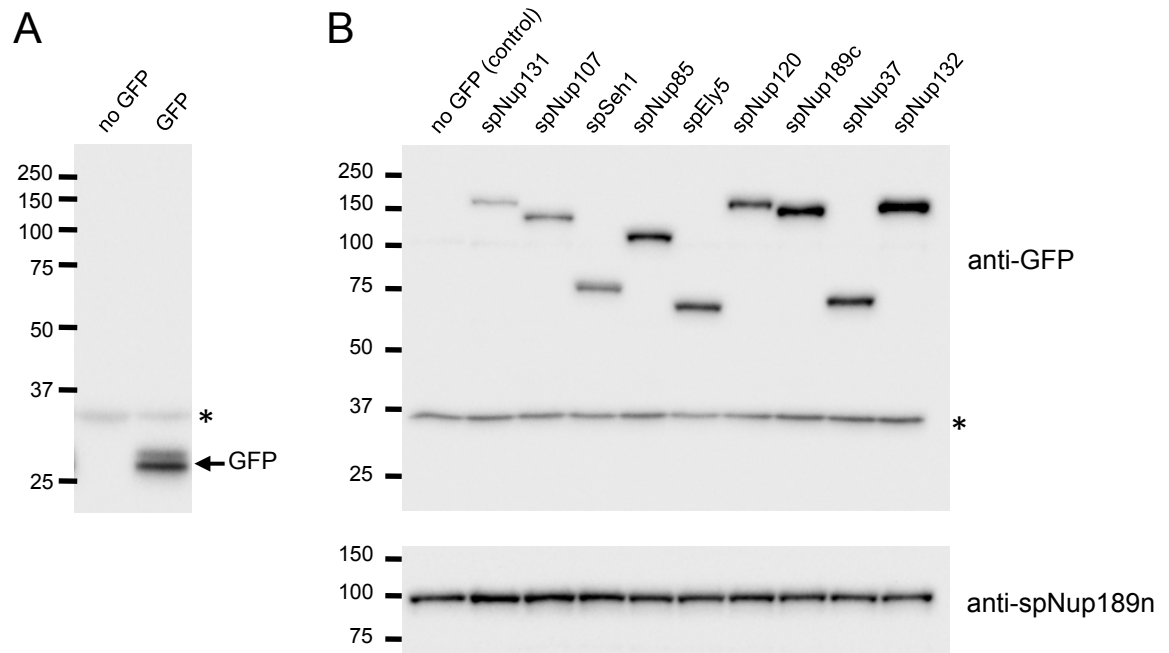

Supplement: nucl-5-149-s01.pdf [file nucl-5-149-s01.pdf]
